# Supplementary material for: Moringa Oleifera Seed Extract Concomitantly Supplemented with Chemotherapy Worsens Tumor Progression in Mice with Triple Negative Breast Cancer and Obesity
Source: MDPI journal article supplement (doi:10.3390/nu13092923), 2021-08-24
Supplement: s1 [file s1]

Supplementary Materials: The following are available online at [www.mdpi.com/xxx/s1](http://www.mdpi.com/xxx/s1).

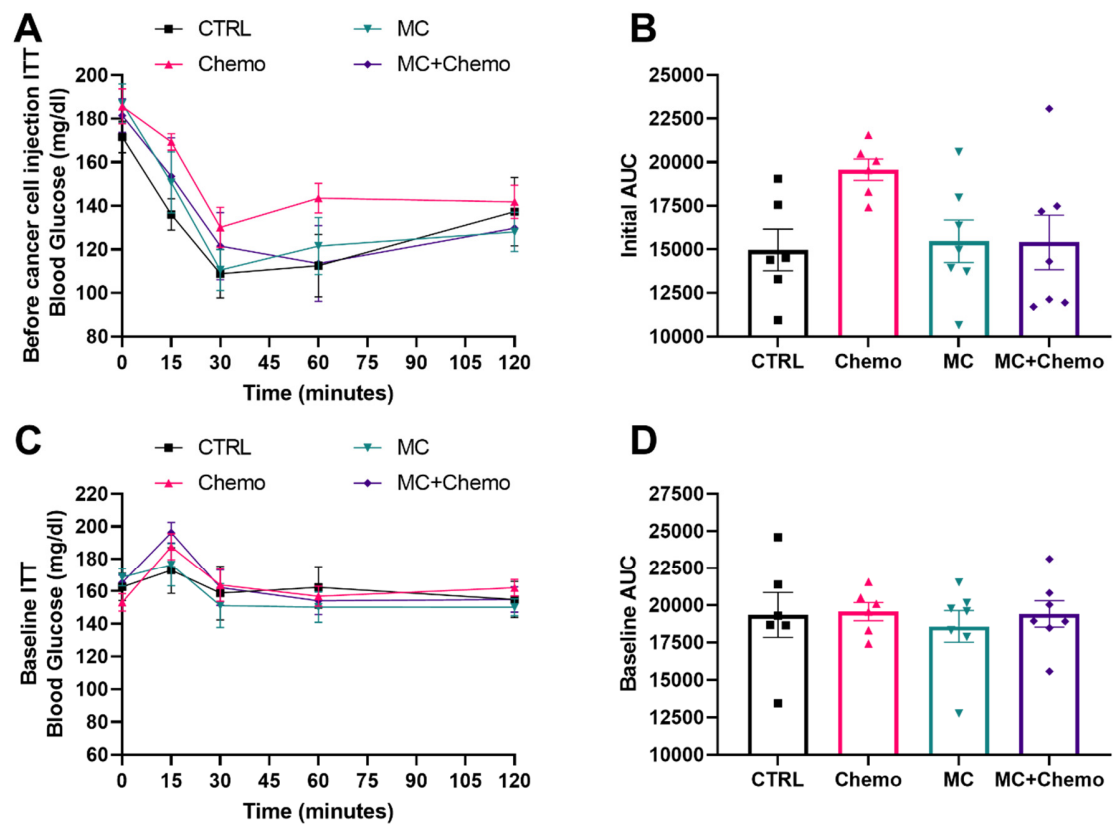

Figure S1. Related to Figure 2.

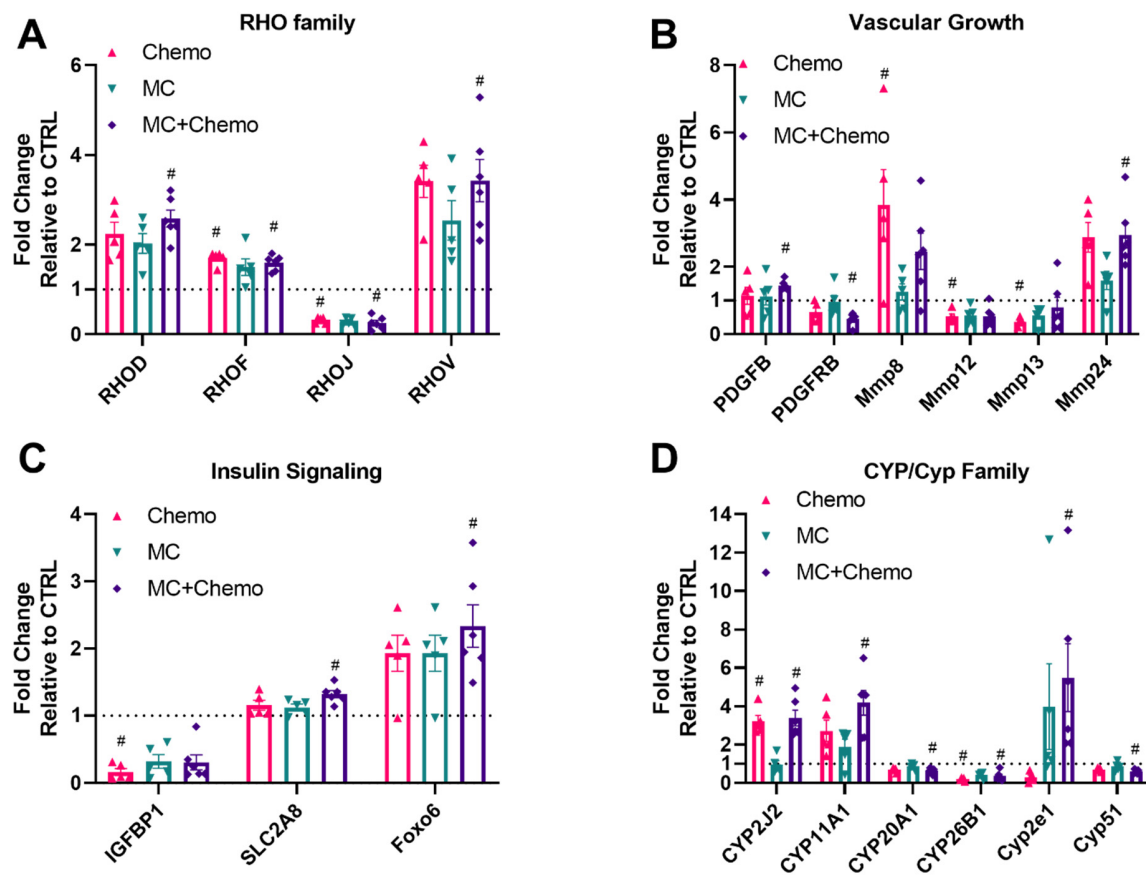

**Figure S2.** Related to Figure 4. Data are shown as the mean  $\pm$  SEM. # padj<0.15
